# Supplementary material for: Synergistic anti-proliferative effects of combination of ABT-263 and MCL-1 selective inhibitor A-1210477 on cervical cancer cell lines
Source: PubMed Central journal article supplement (PMC5870236; doi:10.1186/s13104-018-3302-0), 2018-03-27
Supplement: 13104_2018_3302_MOESM1_ESM.pdf [file 13104_2018_3302_MOESM1_ESM.pdf]

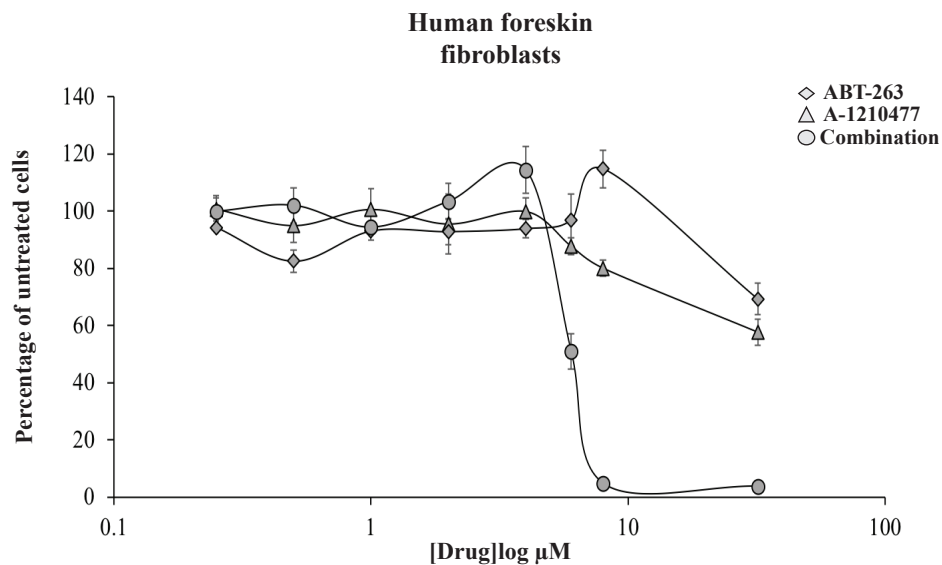

**Additional file 1** Anti-proliferative effects of ABT-263 and A-1210477 in human foreskin fibroblasts at 1:1 drug concentration ratios. The cells were treated with increasing concentrations of ABT-263 (0-32  $\mu\text{M}$ ) (diamond) or A-1210477 (0-32  $\mu\text{M}$ ) (triangle) or combination of ABT-263 and A-1210477 (circle) at 1:1 drug concentration ratios for 72 hours. Cell proliferation was assessed using the SyBr Green I assay. Points represent  $\pm$  SEM of four repeats.
