# Supplementary material for: Synergistic anti-proliferative effects of combination of ABT-263 and MCL-1 selective inhibitor A-1210477 on cervical cancer cell lines
Source: PubMed Central journal article supplement (PMC5870236; doi:10.1186/s13104-018-3302-0), 2018-03-27
Supplement: 13104_2018_3302_MOESM2_ESM.pdf [file 13104_2018_3302_MOESM2_ESM.pdf]

**Additional file 2** Synergistic drug effects of ABT-263 and A-1210477 in the SiHa and CaSki cervical cancer cell lines

| SiHa                        |                    |      |                               | CaSki                       |                    |      |                               |
|-----------------------------|--------------------|------|-------------------------------|-----------------------------|--------------------|------|-------------------------------|
| ABT-263 ( $\mu\text{M}$ )   |                    | CI   | Drug combination interactions | ABT-263 ( $\mu\text{M}$ )   |                    | CI   | Drug combination interactions |
| 0.25                        |                    | ND   |                               | 0.25                        |                    | 0.67 | Synergism                     |
| 0.5                         |                    | ND   |                               | 0.5                         |                    | 0.44 | Synergism                     |
| 1                           | A-1210477          | 1.09 | Nearly additive               | 1                           | A-1210477          | 0.33 | Synergism                     |
| 2                           | (4 $\mu\text{M}$ ) | 0.55 | Synergism                     | 2                           | (4 $\mu\text{M}$ ) | 0.34 | Synergism                     |
| 4                           |                    | 0.27 | Strong synergism              | 4                           |                    | 0.43 | Synergism                     |
| 8                           |                    | 0.33 | Synergism                     | 8                           |                    | 0.57 | Synergism                     |
| 16                          |                    | 0.52 | Synergism                     | 16                          |                    | 0.67 | Synergism                     |
| 32                          |                    | 1.03 | Nearly additive               | 32                          |                    | 1.25 | Moderate synergism            |
| A-1210477 ( $\mu\text{M}$ ) |                    | CI   | Drug combination interactions | A-1210477 ( $\mu\text{M}$ ) |                    | CI   | Drug combination interactions |
| 0.25                        |                    | ND   |                               | 0.25                        |                    | 1.29 | Moderate antagonism           |
| 0.5                         |                    | ND   |                               | 0.5                         |                    | 1.50 | Antagonism                    |
| 1                           | ABT-263            | ND   |                               | 1                           | ABT-263            | 0.67 | Synergism                     |
| 2                           | (4 $\mu\text{M}$ ) | 0.95 | Nearly additive               | 2                           | (2 $\mu\text{M}$ ) | 0.49 | Synergism                     |
| 4                           |                    | 0.35 | Synergism                     | 4                           |                    | 0.39 | Synergism                     |
| 8                           |                    | 0.19 | Strong synergism              | 8                           |                    | 0.31 | Synergism                     |
| 16                          |                    | 0.18 | Strong synergism              | 16                          |                    | 0.32 | Synergism                     |
| 32                          |                    | 0.20 | Strong synergism              | 32                          |                    | 0.75 | Moderate synergism            |

Cells were treated with increasing concentrations of ABT-263 or A-1210477 in the presence or absence of ABT-263 or A-1210477 in the indicated concentration. Combination index values were calculated using the CompuSyn 1.0 software. CI indicates combination index; CI < 1 indicates synergism, CI = 1 indicates additivity, and CI > 1 indicates antagonism and ND = Not determined CI values could not be determined for some combination concentrations as these concentrations were too low to cause an effect on cell proliferation.
